# Supplementary material
Source: PubMed Central journal article supplement (PMC3961005)

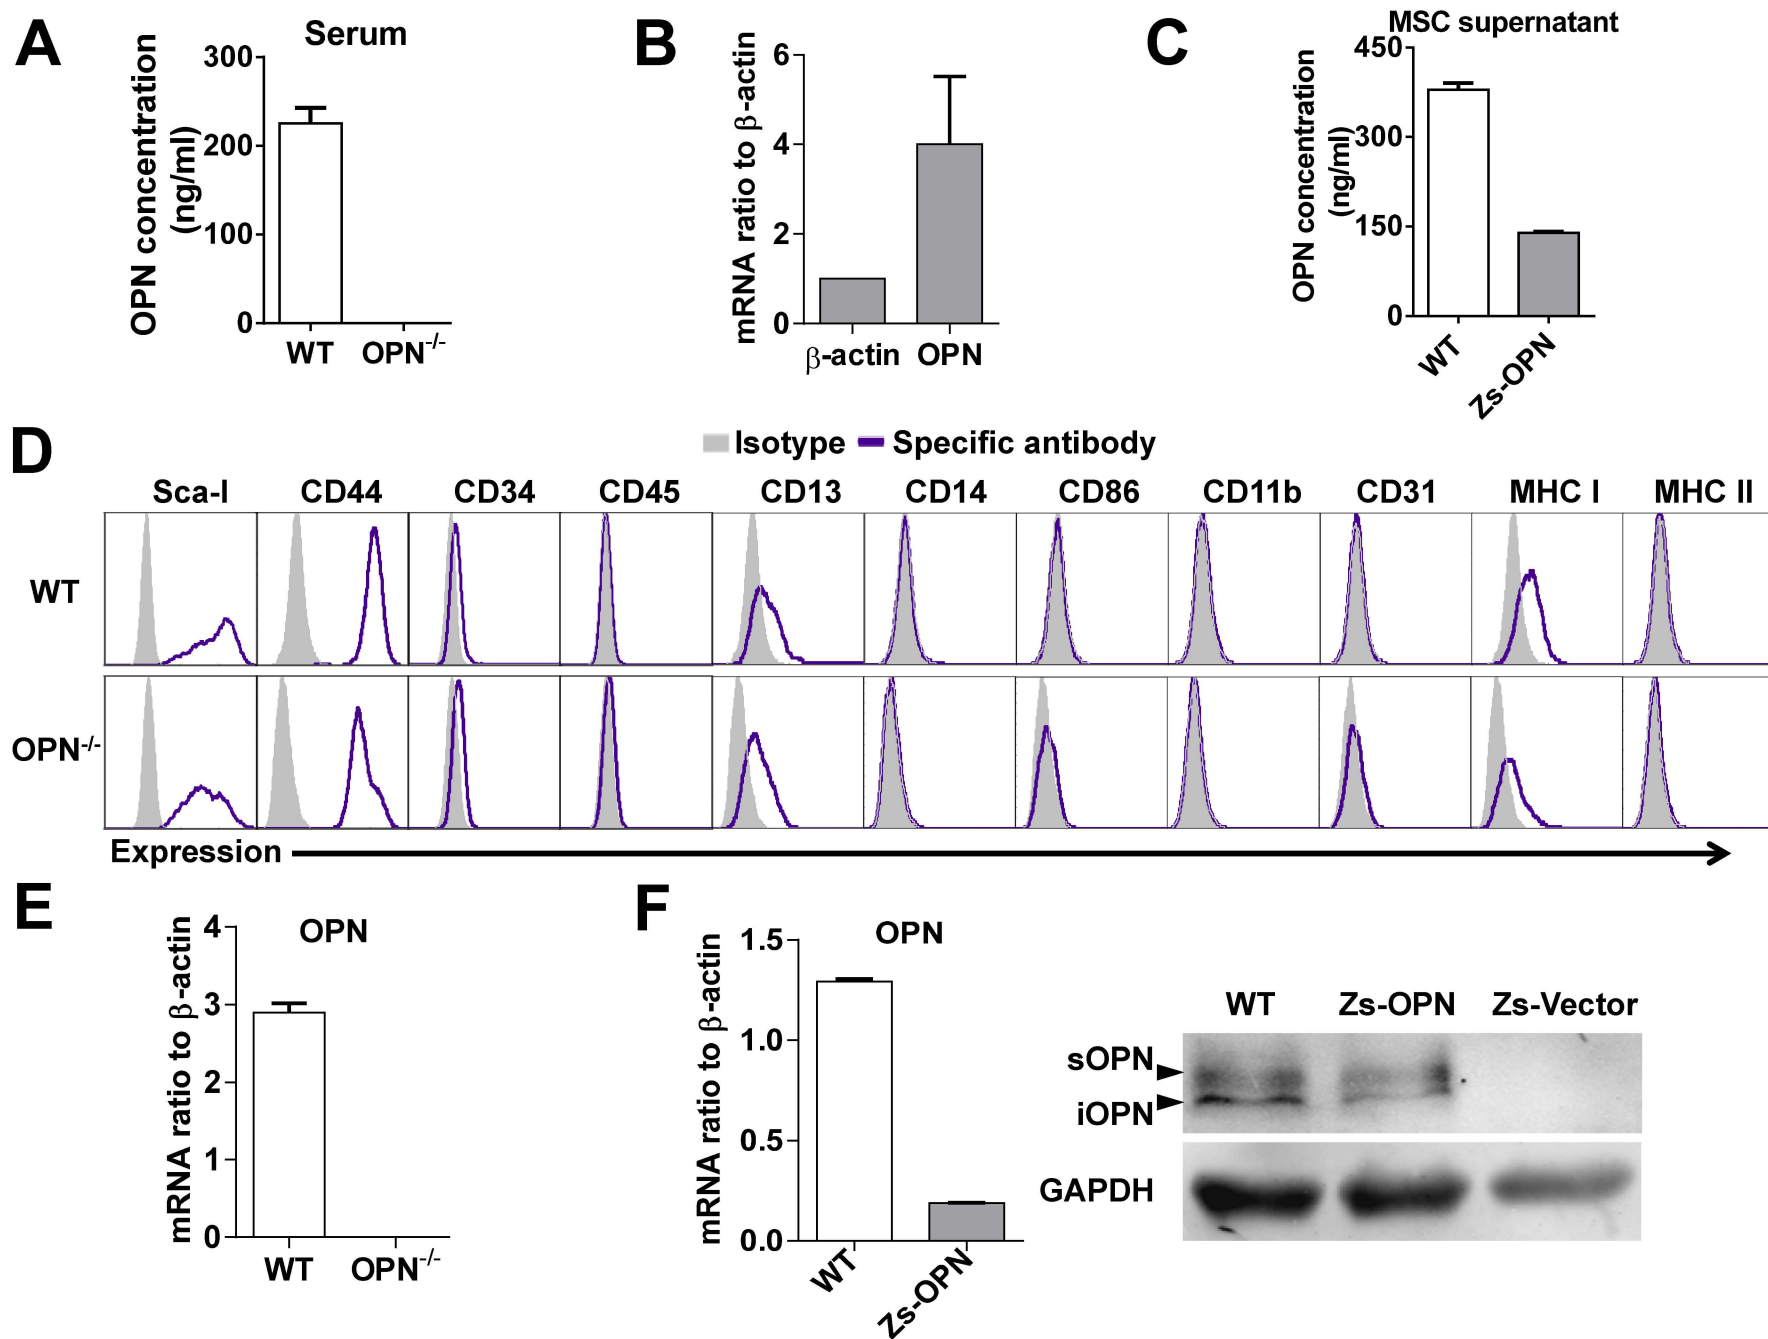

Fig. S1

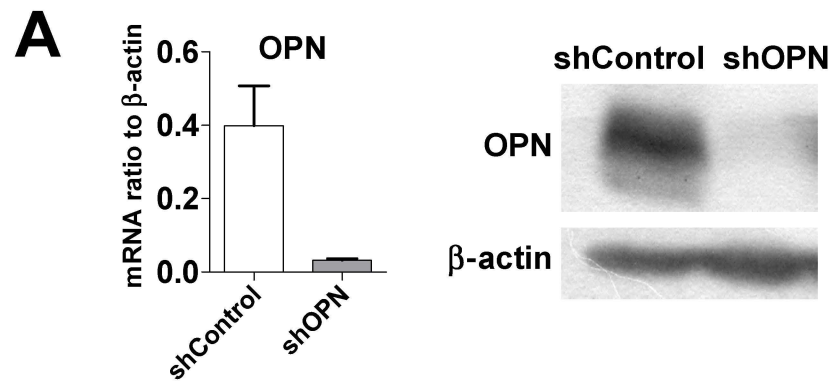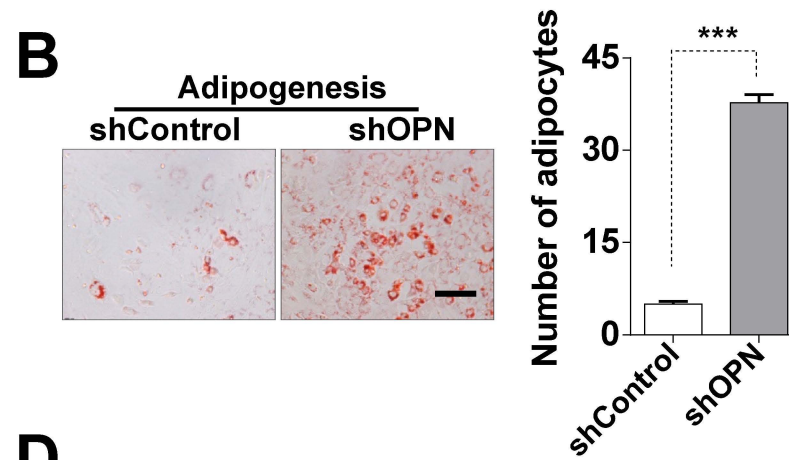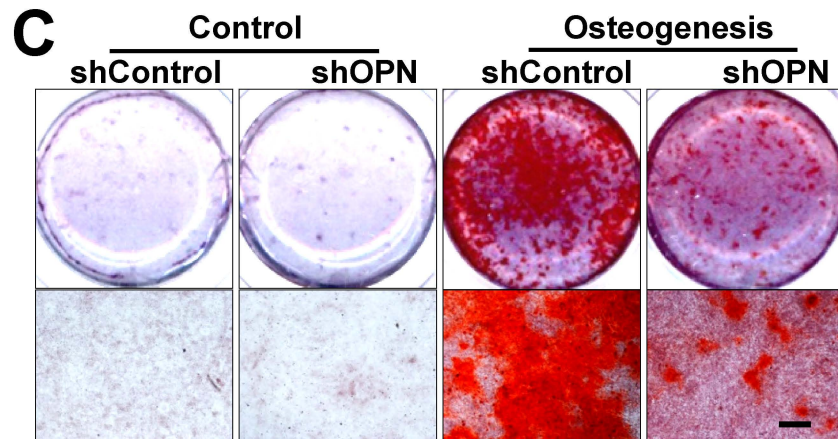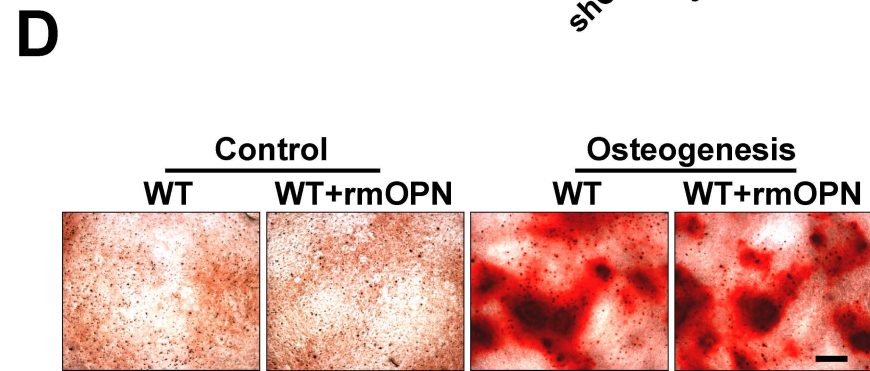

Fig. S2

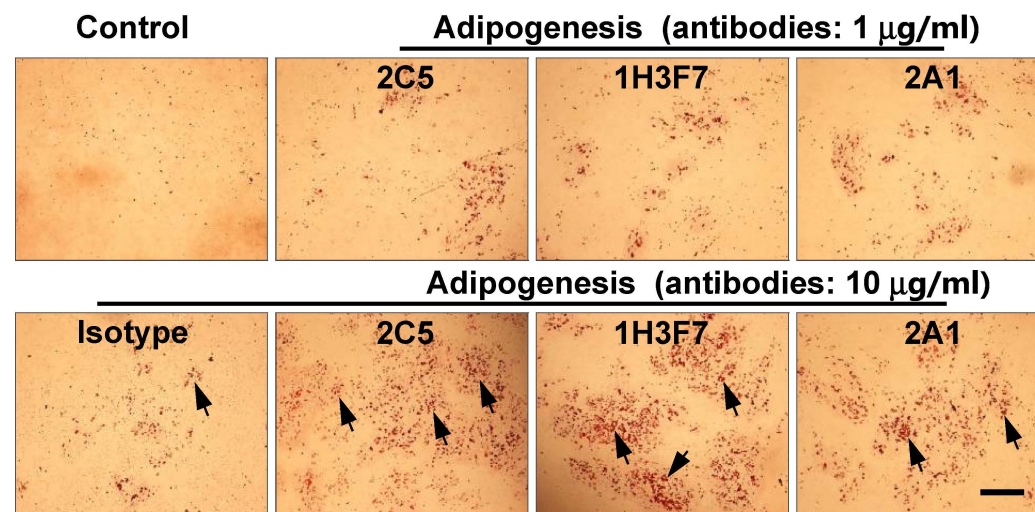

**Fig. S3**

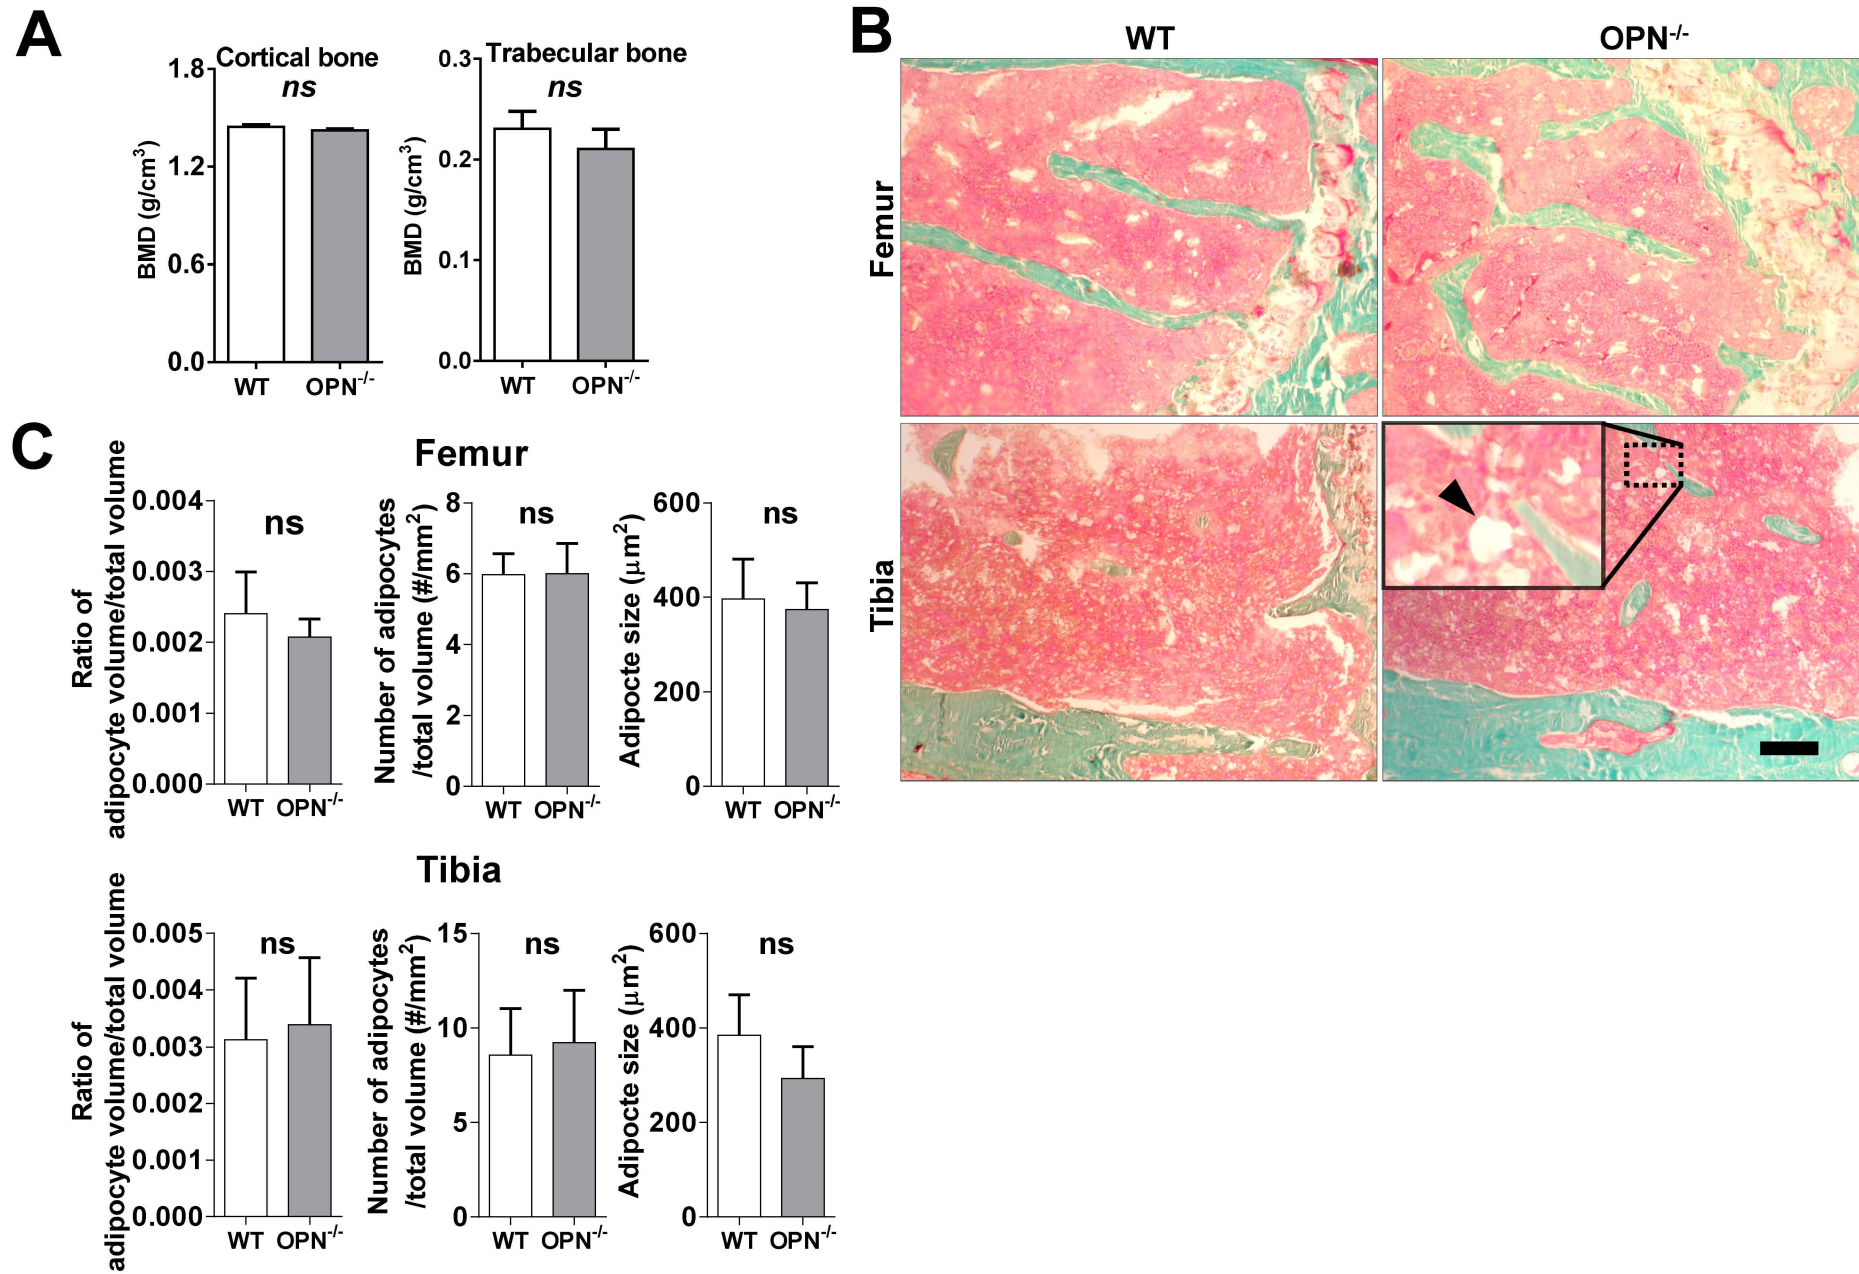

**Fig. S4**

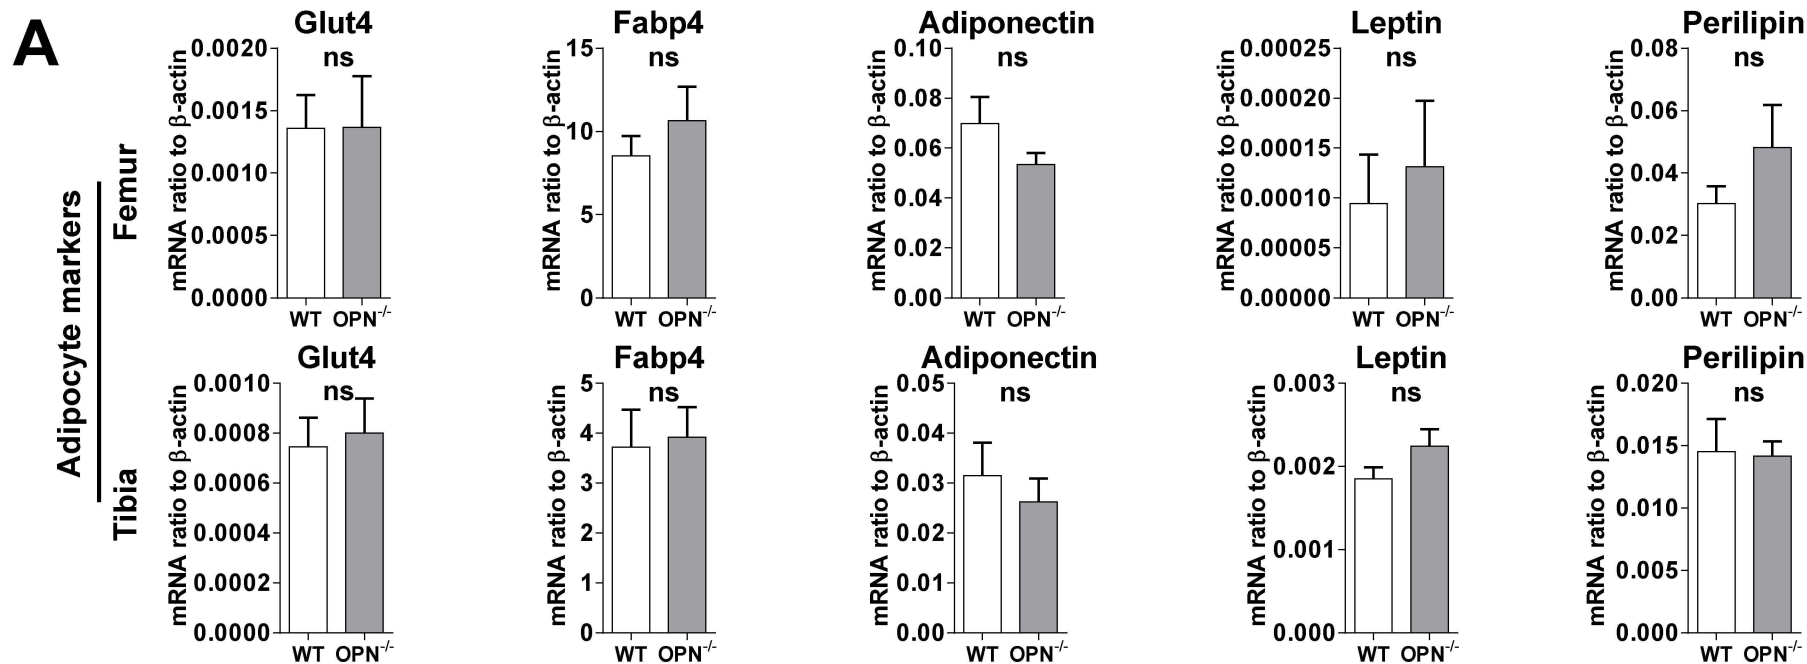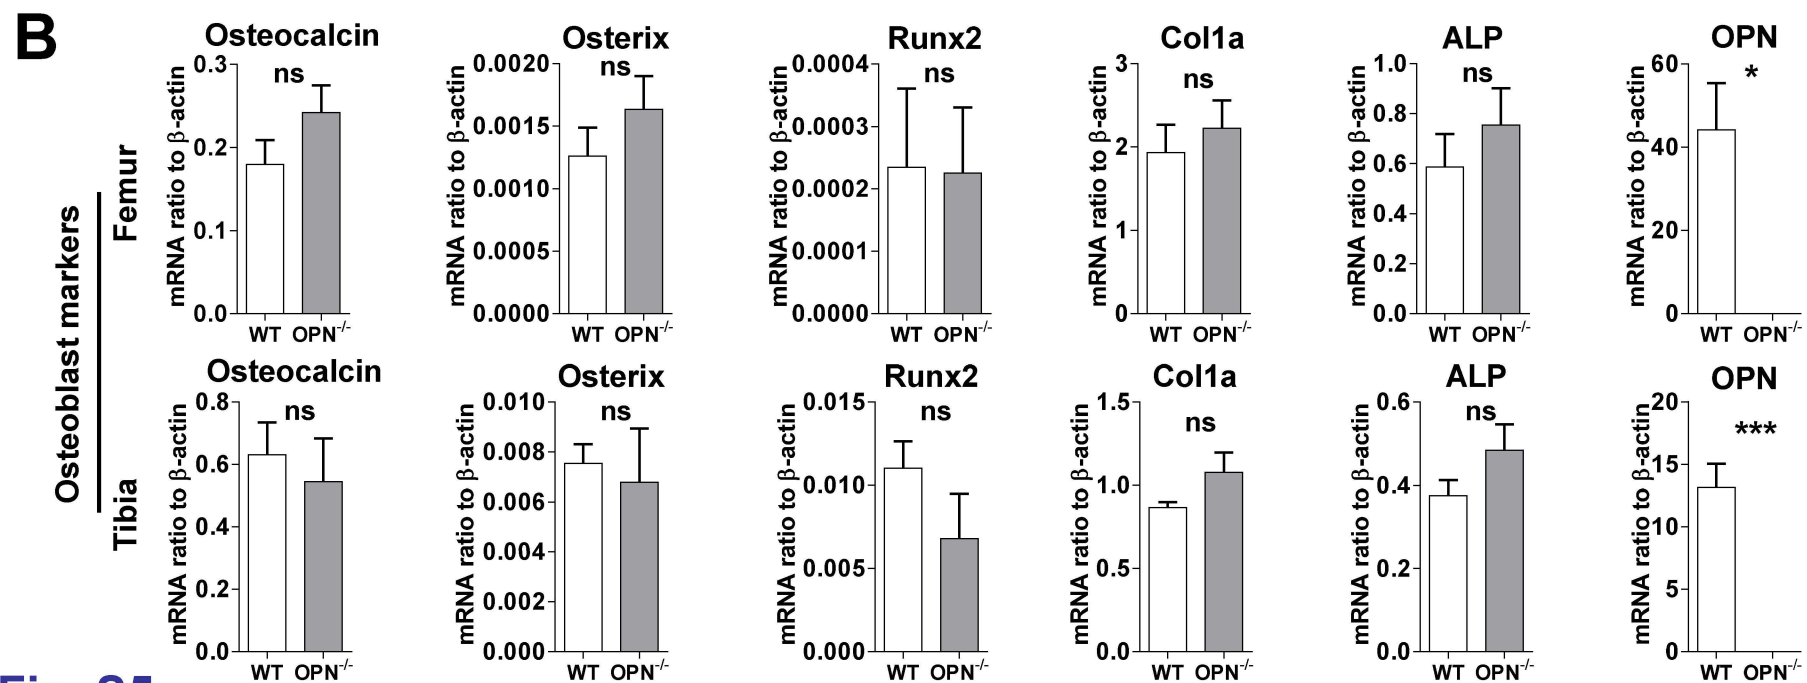

Fig. S5

Supplement: NIHMS531694-supplement-Supp_Fig_S1-S5.pdf [file NIHMS531694-supplement-Supp_Fig_S1-S5.pdf]
